# Supplementary material for: Demographic reconstruction from ancient DNA supports rapid extinction of the great auk
Source: eLife. 2019 Nov 26;8:e47509. doi: 10.7554/eLife.47509 (PMC6879203; doi:10.7554/eLife.47509)
Supplement: Supplementary file 1. — Supplementary file 1a Sample information for all samples collected. Information listed shows institution name and number where sample was sourced, the site location and country where sample was discovered (if known), and any associated date/age information, if known. Those highlighted indicate samples that ultimately passed the filtering settings and were used in the final analysis. Asterisks indicate samples from Thomas et al. (2017). Supplementary file 1b Lab process table for all samples collected. Table includes information on sample type, weight used in extraction, which library build method was used, if hybridization capture was used, and which type of sequencing was performed. Those highlighted indicate samples that ultimately passed the filtering settings and were used in the final analysis. Asterisks indicate samples from Thomas et al. (2017). Supplementary file 1c PALEOMIX summary data for mitogenome samples. Summary statistics table from all great auk samples sent for sequencing. Library type: PE = Paired end, SE = Single end, *=both. Samples highlighted were used in final analysis. Supplementary file 1d GenBank accession numbers. GenBank accession numbers for samples used in analysis. Supplementary file 1e Age information for samples used in analysis. Age information for samples used in the BEAST and TempNet analyses. [file elife-47509-supp1.xlsx]

## Sheet: Supplementary File 1a
Lab ID	Institution	Institution Number	Site Location & Country	Age (associated period / estimated median age)
		(if available)
MK09	Cardiff University	Spec No 22722. CH98 (595)	Cladh Hallan, South Uist, Scotland	1135-1035 BC-635-535 BC est. 2850
MK10	Cardiff University	CH99 (692)	Cladh Hallan, South Uist, Scotland	1135-1035 BC-635-535 BC est. 2850
MK11	Cardiff University	CH00 (1512)	Cladh Hallan, South Uist, Scotland	1135-1035 BC-635-535 BC est. 2850
MK12	Cardiff University	CH96 (423)	Cladh Hallan, South Uist, Scotland	1135-1035 BC-635-535 BC est. 2850
MK13	Cardiff University	Spec No 20232 CH00 (1785)	Cladh Hallan, South Uist, Scotland	1135-1035 BC-635-535 BC est. 2850
MK14	Cardiff University	(36) B96 337	Bornais Mound 1, South Uist, Scotland	Late Scottish Iron Age 400-800AD est. 1500
MK15	Cardiff University	(481) 490 2	Bornais Mound 1, South Uist, Scotland	Late Scottish Iron Age 400-800AD est. 1500
MK16	Cardiff University	(90) (404) B97	Bornais Mound 1, South Uist, Scotland	Late Scottish Iron Age 400-800AD est. 1500
MK17	Cardiff University	(487) 45 456	Bornais Mound 1, South Uist, Scotland	Late Scottish Iron Age 400-800AD est. 1500
MK18	Cardiff University	(481) 307	Bornais Mound 1, South Uist, Scotland	Late Scottish Iron Age 400-800AD est. 1500
MK19	University of Southampton	255 (Context 027)	Tofts Ness, Sanday, Orkney, Scotland	Neolithic/Early Bronze Age (2000BC) est. 4000
MK20	University of Southampton	3 (TN86, 016)	Tofts Ness, Sanday, Orkney, Scotland	Neolithic/Early Bronze Age (2000BC) est. 4000
MK21	University of Southampton	57 (Context 1123)	Tofts Ness, Sanday, Orkney, Scotland	Neolithic/Early Bronze Age (2000BC) est. 4000
MK22	University of Southampton	366 (Context 1007)	Tofts Ness, Sanday, Orkney, Scotland	Neolithic/Early Bronze Age (2000BC) est. 4000
MK23	University of Southampton	136 (TN86, 012)	Tofts Ness, Sanday, Orkney, Scotland	Neolithic/Early Bronze Age (2000BC) est. 4000
MK24	University of Southampton	293 (TN 0194)	Tofts Ness, Sanday, Orkney, Scotland	Neolithic/Early Bronze Age (2000BC) est. 4000
MK25	University of Southampton	108 (TN86, 0177)	Tofts Ness, Sanday, Orkney, Scotland	Neolithic/Early Bronze Age (2000BC) est. 4000
MK26	Portland Museum	PM1 (Context 189)	Royal Manor Field, Portland, England	Roman age est. 2000
MK27	Portland Museum	PM2 (Context 189)	Royal Manor Field, Portland, England	Roman age est. 2000
MK28	Portland Museum	PM3 (Context 199)	Royal Manor Field, Portland, England	Roman age est. 2000
MK29	Portland Museum	PM4 (Context 199)	Royal Manor Field, Portland, England	Roman age est. 2000
MK30	National Museum of Scotland	NA	Middle Oronsay, Scotland	6200-5100
MK31	National Museum of Scotland	1940-15-40	Knowe of Ramsay, Orkney, Scotland	Neolithic
MK32	National Museum of Scotland	z.2002.175.1 GA753	Freswick Links, Caithness, Scotland	Late Iron Age
MK33	National Museum of Scotland	z.2003.45.1 HP358	Caisteal nan Gillean, Oronsay, Scotland	Mesolithic
MK34	National Museum of Scotland	block 8 F266	Cnip, Lewis, Scotland	Middle Iron Age
MK35	National Museum of Scotland	Context No 116, block 16	Cnip, Lewis, Scotland	Middle Iron Age
MK36	Arkeologi Museoa, Bilbao	SC. B4.73.14	Santa Catalina, Lekeitio, Spain	Magda. Sup. Level II 12500-14000 est. 13250
MK37	Arkeologi Museoa, Bilbao	SC.C8. L 22.295	Santa Catalina, Lekeitio, Spain	Magda. Sup. Level II 12500-14000 est. 13250
MK38	Arkeologi Museoa, Bilbao	SC.B6.L26.51	Santa Catalina, Lekeitio, Spain	Magda. Sup. Level II 12500-14000 est. 13250
MK39	Arkeologi Museoa, Bilbao	SC.C6.L29E.1602	Santa Catalina, Lekeitio, Spain	Magda. Fin. Level III 12900-15000 est. 13950
MK40	Arkeologi Museoa, Bilbao	SC.C6.L31C.1428	Santa Catalina, Lekeitio, Spain	Magda. Fin. Level III 12900-15000 est. 13950
MK41	Arkeologi Museoa, Bilbao	SC.B8.L29E.2601	Santa Catalina, Lekeitio, Spain	Magda. Fin. Level III 12900-15000 est. 13950
MK42	Arkeologi Museoa, Bilbao	SC.C8.L29G.10440-10442	Santa Catalina, Lekeitio, Spain	Magda. Fin. Level III 12900-15000 est. 13950
MK43	Arkeologi Museoa, Bilbao	SC.B6.L29E.1754	Santa Catalina, Lekeitio, Spain	Magda. Fin. Level III 12900-15000 est. 13950
MK44	Arkeologi Museoa, Bilbao	SC.B8.147.425	Santa Catalina, Lekeitio, Spain	Magda. Fin. Level III 12900-15000 est. 13950
MK45	Arkeologi Museoa, Bilbao	PRA.B8.7365	Pico Ramos, Muskiz, Spain	5000
MK46	Natural History Museum of Denmark	NA	Funk Island, Newfoundland, Canada	Unknown, but unlikely over 1000
MK47	Natural History Museum of Denmark	5504	Funk Island, Newfoundland, Canada	Unknown, but unlikely over 1000
MK48	Natural History Museum of Denmark	10010	Vardø, Norway	Unknown, but unlikely over 5000
MK49	Natural History Museum of Denmark	NA	Vardø, Norway	Unknown, but unlikely over 5000
MK50	Natural History Museum of Denmark	NA	Site location unknown, Iceland	Killed 1821
MK51	Natural History Museum of Denmark	NA	Qeqertarsuatsiaat, Greenland	Killed 1815
MK52	Natural History Museum of Denmark	NA	Funk Island, Newfoundland, Canada	Unknown, unlikely over 1000
MK53	Natural History Museum of Denmark	ZMK 4/1861 (19/63)	Mejlgård, Randers, Denmark	Ertebølle culture. 5300 BC – 3950 BC
				C-14: (Bos primigenius) 5115 ± 70 BP
MK54	Natural History Museum of Denmark	ZMK 4/1893 (24/63)	Havnø, Aalborg, Denmark	Ertebølle culture. C-14: 4130 ± 40 BP
MK55	Natural History Museum of Denmark	ZMK 130/1967	Villingebæk Island, Frederiksborg, Denmark	Kongemose Culture, 6000 BC–5200 BC
MK56	Natural History Museum of Denmark	ZMK 101/1951	Reykjavik, Iceland	Unknown
MK57	Natural History Museum of Denmark	ZMK 11/1915	Nivågård, Frederiksborg, Denmark	Early Ertebølleruten Culture
MK58	Natural History Museum of Denmark	ZMK 111/1952	Kangeq, Greenland	Thule Culture 1400-1952 AD
MK59	Natural History Museum of Denmark	ZMK 111/1952	Kangeq, Greenland	Thule Culture 1400-1952 AD
MK60	Natural History Museum of Denmark	ZMK 1/1851	Gudumlund, Aalborg, Denmark	Ertebølle culture. C-14: Phoca groenl 5275 ± 50 BP
MK61	Natural History Museum of Denmark	ZMK 1/1851	Gudumlund, Aalborg, Denmark	Ertebølle culture. C-14: Phoca groenl 5275 ± 50 BP
MK62	Natural History Museum of Denmark	ZMK 31/1901	Sølager, Frederiksborg, Denmark	Ertebølleruten Culture, Neolithic Funnel Beaker Culture.
				C-14: Phoca groenl. 5460 ± 40 BP
MK63	Natural History Museum of Denmark	ZMK 08/1908	Kassemose, Frederiksborg, Denmark	Ertebølleruten Culture and Neolithic
MK64	Natural History Museum of Denmark	ZMK 104/1968	Olsbjerg, Sejerø, Holbæk, Denmark	Assumed Ertebølleruten Culture
MK65	Natural History Museum of Denmark	ZMK 5/1898	Klintesø, Holbæk, Denmark	Ertebølleruten Culture C-14: Capra: 3926 ± 33 BP
MK66	Natural History Museum of Denmark	ZMK 103/1956	Bergmandsdal, Frederiksborg, Denmark	Ertebølleruten Culture
MK67	Natural History Museum of Denmark	ZMK 130/1970	Hope Colony, Godthåbsfjord, Greenland	1721-1728AD 296-289
MK68	Natural History Museum of Denmark	ZMK 130/1970	Hope Colony, Godthåbsfjord, Greenland	1721-1728AD 296-289
MK69	Natural History Museum of Denmark	ZMK 39/1909	Kollafjarðarnes, Iceland	Unknown
MK70	Natural History Museum of Denmark	ZMK 39/1909	Vardø, Norway	1475 - 1700 century
MK71	Natural History Museum of Denmark	ZMK 142/1972	Igdlorpait, Greenland	1721-1728AD 296-289
MK72	University of Amsterdam	0B97-2159-1	Schipluiden, Midden-Delfland, Netherlands	First century AD (Roman) 1600-2000
MK73	University of Amsterdam	NA	Velsen, Valkenburg, Netherlands	Roman 1600-2000
MK74	American Museum of Natural History	Bone # 4547, AMNH 31855	Funk Island, Newfoundland, Canada	Unknown, but unlikely over 1000
MK75	American Museum of Natural History	Bone # 4408, AMNH 31847	Funk Island, Newfoundland, Canada	Unknown, but unlikely over 1000
MK76	American Museum of Natural History	Bone # 4218, AMNH 31833	Funk Island, Newfoundland, Canada	Unknown, but unlikely over 1000
MK77	American Museum of Natural History	Bone # 4387, AMNH 31846	Funk Island, Newfoundland, Canada	Unknown, but unlikely over 1000
MK78	American Museum of Natural History	Bone # 4624, AMNH 31857	Funk Island, Newfoundland, Canada	Unknown, but unlikely over 1000
MK79	American Museum of Natural History	Bone # 4339, AMNH 31843	Funk Island, Newfoundland, Canada	Unknown, but unlikely over 1000
MK80	American Museum of Natural History	Bone # 4549, AMNH 31856	Funk Island, Newfoundland, Canada	Unknown, but unlikely over 1000
MK81	American Museum of Natural History	Bone # 4446, AMNH 31851	Funk Island, Newfoundland, Canada	Unknown, but unlikely over 1000
MK82	American Museum of Natural History	Bone # 4204, AMNH 31830	Funk Island, Newfoundland, Canada	Unknown, but unlikely over 1000
MK83	American Museum of Natural History	Bone # 4285, AMNH 31842	Funk Island, Newfoundland, Canada	Unknown, but unlikely over 1000
MK84	American Museum of Natural History	Bone # 4179, AMNH 31829	Funk Island, Newfoundland, Canada	Unknown, but unlikely over 1000
MK85	American Museum of Natural History	Bone # 4170, AMNH 31828	Funk Island, Newfoundland, Canada	Unknown, but unlikely over 1000
MK86	American Museum of Natural History	Bone # 4269, AMNH 31841	Funk Island, Newfoundland, Canada	Unknown, but unlikely over 1000
MK87	American Museum of Natural History	Bone # 4230, AMNH 31836	Funk Island, Newfoundland, Canada	Unknown, but unlikely over 1000
MK88	American Museum of Natural History	Bone # 4448, AMNH 31852	Funk Island, Newfoundland, Canada	Unknown, but unlikely over 1000
MK89	American Museum of Natural History	Bone # 4534, AMNH 31854	Funk Island, Newfoundland, Canada	Unknown, but unlikely over 1000
MK90	American Museum of Natural History	Bone # 4526, AMNH 31853	Funk Island, Newfoundland, Canada	Unknown, but unlikely over 1000
MK91	American Museum of Natural History	Bone # 4423, AMNH 31848	Funk Island, Newfoundland, Canada	Unknown, but unlikely over 1000
MK92	American Museum of Natural History	Bone # 4425, AMNH 31849	Funk Island, Newfoundland, Canada	Unknown, but unlikely over 1000
MK93	American Museum of Natural History	Bone # 4429, AMNH 31850	Funk Island, Newfoundland, Canada	Unknown, but unlikely over 1000
MK94	American Museum of Natural History	Bone # 4211, AMNH 31831	Funk Island, Newfoundland, Canada	Unknown, but unlikely over 1000
MK95	American Museum of Natural History	Bone # 4214, AMNH 31832	Funk Island, Newfoundland, Canada	Unknown, but unlikely over 1000
MK96	American Museum of Natural History	Bone # 4219, AMNH 31834	Funk Island, Newfoundland, Canada	Unknown, but unlikely over 1000
MK97	American Museum of Natural History	Bone # 4223, AMNH 31835	Funk Island, Newfoundland, Canada	Unknown, but unlikely over 1000
MK98	American Museum of Natural History	Bone # 4232, AMNH 31837	Funk Island, Newfoundland, Canada	Unknown, but unlikely over 1000
MK99	American Museum of Natural History	Bone # 4240, AMNH 31838	Funk Island, Newfoundland, Canada	Unknown, but unlikely over 1000
MK100	American Museum of Natural History	Bone # 4254, AMNH 31839	Funk Island, Newfoundland, Canada	Unknown, but unlikely over 1000
MK101	American Museum of Natural History	Bone # 4264, AMNH 31840	Funk Island, Newfoundland, Canada	Unknown, but unlikely over 1000
MK102	American Museum of Natural History	Bone # 4374, AMNH 31844	Funk Island, Newfoundland, Canada	Unknown, but unlikely over 1000
MK103	American Museum of Natural History	Bone # 4380, AMNH 31845	Funk Island, Newfoundland, Canada	Unknown, but unlikely over 1000
MK104	Gothenburg Naturhistoriska Museum	GNM 6022	Sotenkanalen, Sweden	est. 5000
MK105	Gothenburg Naturhistoriska Museum	GMN 6048	Sotenkanalen, Sweden	est. 5000
MK106	Gothenburg Naturhistoriska Museum	GNM 18684	Nödö, Sweden	est. 5000
MK107	Gothenburg Naturhistoriska Museum	GNM 6112	Nödö, Sweden	est. 5000
MK108	Gothenburg Naturhistoriska Museum	GNM 6849	Skalbank Otterön, Sweden	est. 5000
MK109	Gothenburg Naturhistoriska Museum	GNM 6194	Sotenkanalen, Sweden	est. 5000
MK110	Gothenburg Naturhistoriska Museum	GNM 18,685	Skalbank Otterön, Sweden	est. 5000
MK111	Gothenburg Naturhistoriska Museum	GNM 9644	Skalbank Otterön, Sweden	est. 5000
MK112	Gothenburg Naturhistoriska Museum	84,152-16 Hultas, A 6	Rottjärnslid, Sweden	est. 5000
MK113	Gothenburg Naturhistoriska Museum	84,152-16 Hog 5	Rottjärnslid, Sweden	est. 5000
MK114	Gothenburg Naturhistoriska Museum	GNM 18,692	Sotenkanalen, Sweden	est. 5000
MK115	University of Bergen	JS.603	Iversfjord, Finnmark, Norway	3000-2400BC, est. 5016-4416
MK116	University of Bergen	JS.523	Storbåthelleren, Nordland, Norway	3300-2790/790-100BC, est. 5316-2116
MK117	University of Bergen	JS.528	Storbåthelleren, Nordland, Norway	3300-2790/790-100BC, est. 5316-2116
MK118	University of Bergen	JS.412	Viste, Rogaland, Norway	Mesolithic 7000-5000BC
MK119	University of Bergen	JS.412 3	Viste, Rogaland, Norway	Mesolithic 7000-5000BC
MK120	University of Bergen	JS.427	Skjonghelleren, Møre og Romsdal, Norway	Older Iron Age 500BC-500AD
MK121	University of Bergen	JS.371	Nyelv, Finnmark, Norway	5000-4000BP C-14: 4160+- 80
MK122	University of Bergen	JS.260	Kirkehelleren, Nordland, Norway	Mesolithic to 500AD
MK123	University of Bergen	JS.445	Gronehelleren, Sogn og Fjordane, Norway	Late Mesolithic- recent times
MK124	University of Bergen	JS.445	Gronehelleren, Sogn og Fjordane, Norway	Late Mesolithic- recent times
MK125	Natural History Museum, University of Oslo	Bone #1213.1 NHMO-BI-99147	Funk Island, Newfoundland, Canada	Unknown, but unlikely over 1000
MK126	Natural History Museum, University of Oslo	Bone #1213.2 NHMO-BI-99148	Funk Island, Newfoundland, Canada	Unknown, but unlikely over 1000
MK127	Natural History Museum, University of Oslo	Bone #1213.3 NHMO-BI-99149	Funk Island, Newfoundland, Canada	Unknown, but unlikely over 1000
MK128	Natural History Museum, University of Oslo	Bone #1213.4 NHMO-BI-99150	Funk Island, Newfoundland, Canada	Unknown, but unlikely over 1000
MK129	Natural History Museum, University of Oslo	Bone #1213.5 NHMO-BI-99151	Funk Island, Newfoundland, Canada	Unknown, but unlikely over 1000
MK130	Natural History Museum, University of Oslo	Bone #1213.6 NHMO-BI-99152	Funk Island, Newfoundland, Canada	Unknown, but unlikely over 1000
MK131*	Natural History Museum of Denmark	NHMD 153069	Eldey Island, Iceland	Killed 1844
MK132*	Natural History Museum of Denmark	NHMD 153070	Eldey Island, Iceland	Killed 1844
MK133*	Landesmuseum Natur und Mensch Oldenburg	AVE 8086	Unknown, most likely Iceland	est. 170-200 years old
MK134*	Übersee-Museum Bremen	RKNr. 2392	Unknown, most likely Iceland	est. 170-200 years old
MK135*	Institut royal des Sciences naturelles de Belgique	RBINS 5355	Eldey Island, Iceland	Killed 1844
MK136*	Natural History Museum of Los Angeles County	LACM 76476	Unknown, most likely Iceland	est. 170-200 years old
MK137	Musée d'Histoire Naturelle Neuchâtel	NA	Unknown, most likely Iceland	est. 170-200 years old
MK138*	Zoologisches Museum der Christian-Albrechts	cat. No. A0585	Unknown, most likely Iceland	est. 170-200 years old
	Universität zu Kiel
LastGA2_Heart*	Natural History Museum of Denmark	NHMD 153070	Eldey Island, Iceland	Killed 1844

## Sheet: Supplementary File 1b
Lab ID	Sample type	Weight (mg)	Extraction	DSlib	SSlib	Capture	Sequencing type
MK09	Bone	33.6	Yes	Yes	Yes	Yes	NA
MK10	Bone	20.1	Yes	Yes	Yes	Yes	MiSeq PE75
MK11	Bone	27.9	Yes	Yes	No	No	NA
MK12	Bone	32.8	Yes	Yes	No	No	NA
MK13	Bone	7.6	Yes	Yes	Yes	Yes	Nano MiSeq PE70/
							MiSeq PE75
MK14	Bone	21.3	Yes	Yes	No	No	NA
MK15	Bone	31	Yes	Yes	Yes	Yes	Nano MiSeq PE70/
							MiSeq PE75
MK16	Bone	26.2	Yes	Yes	No	No	NA
MK17	Bone	48.6	Yes	Yes	No	No	NA
MK18	Bone	22.1	Yes	Yes	Yes	Yes	NA
MK19	Bone	15.3	Yes	Yes	No	No	NA
MK20	Bone	27.8	Yes	Yes	No	No	NA
MK21	Bone	22.2	Yes	Yes	Yes	Yes	MiSeqPE75
MK22	Bone	19.6	Yes	Yes	No	No	NA
MK23	Bone	35	Yes	Yes	No	No	NA
MK24	Bone	53.6	Yes	Yes	No	No	NA
MK25	Bone	38.2	Yes	Yes	Yes	Yes	MiSeq PE150/
							HiSeq SR100
MK26	Bone	50	Yes	Yes	Yes	Yes	HiSeq SR100
MK27	Bone	69.1	Yes	Yes	Yes	Yes	NA
MK28	Bone	34.8	Yes	Yes	Yes	Yes	MiSeq PE150/
							HiSeq SR100
MK29	Bone	59.6	Yes	Yes	Yes	Yes	HiSeq SR100
MK30	Bone	36.5	Yes	Yes	Yes	Yes	Nano MiSeq PE70/
							MiSeq PE 75
MK31	Bone	32.4	Yes	Yes	Yes	Yes	Nano MiSeq PE70/
							MiSeq PE 75
MK32	Bone	63.2	Yes	Yes	Yes	Yes	NA
MK33	Bone	31	Yes	Yes	Yes	Yes	NA
MK34	Bone	41.7	Yes	Yes	Yes	Yes	Nano MiSeq PE70/
							MiSeq PE 75
MK35	Bone	47.7	Yes	Yes	No	No	NA
MK36	Bone	36.2	Yes	Yes	Yes	Yes	NA
MK37	Bone	67.3	Yes	Yes	Yes	Yes	HiSeq SR100
MK38	Bone	58	Yes	Yes	Yes	Yes	HiSeq SR100
MK39	Bone	46.4	Yes	Yes	No	No	NA
MK40	Bone	59	Yes	Yes	Yes	Yes	MiSeq PE150/
							HiSeq SR100
MK41	Bone	56.2	Yes	Yes	Yes	Yes	NA
MK42	Bone	40.2	Yes	Yes	Yes	Yes	MiSeq PE75
MK43	Bone	55.9	Yes	Yes	No	No	NA
MK44	Bone	58.6	Yes	Yes	Yes	Yes	Nano MiSeq PE70/
							MiSeq PE 75
MK45	Bone	89.2	Yes	Yes	Yes	Yes	HiSeq SR100
MK46	Bone	41.4	Yes	Yes	Yes	Yes	MiSeq PE150/
							HiSeq SR100
MK47	Bone	53	Yes	Yes	No	Yes	HiSeq SR100
MK48	Bone	61.4	Yes	Yes	Yes	Yes	MiSeq PE150/
							HiSeq SR100
MK49	Bone	65.5	Yes	Yes	Yes	Yes	MiSeq PE75
MK50	Bone	68	Yes	Yes	Yes	Yes	Nano MiSeq PE70/
							MiSeq PE75
MK51	Bone	47.1	Yes	Yes	Yes	Yes	HiSeq SR100
MK52	Bone	40	Yes	Yes	No	No	NA
MK53	Bone	45	Yes	No	Yes	Yes	HiSeq SR100
MK54	Bone	66	Yes	No	Yes	Yes	MiSeq PE75
MK55	Bone	45	Yes	No	Yes	Yes	MiSeq PE150/
							HiSeq SR100
MK56	Bone	50.5	Yes	No	Yes	Yes	NA
MK57	Bone	30	Yes	No	Yes	Yes	Nano MiSeq PE70/
							MiSeq PE75
MK58	Bone	48.7	Yes	No	Yes	Yes	HiSeq SR100
MK59	Bone	50.5	Yes	No	No	No	NA
MK60	Bone	35.1	Yes	No	Yes	Yes	Nano MiSeq PE70/
							MiSeq PE75
MK61	Bone	17.2	Yes	No	No	No	NA
MK62	Bone	33.2	Yes	No	Yes	Yes	Nano MiSeq PE70/
							MiSeq PE 75
MK63	Bone	20.5	Yes	No	Yes	Yes	Nano MiSeq PE70/
							MiSeq PE75
MK64	Bone	58.3	Yes	No	Yes	Yes	HiSeq SR100
MK65	Bone	45.9	Yes	No	Yes	Yes	MiSeq PE75
MK66	Bone	43.5	Yes	No	Yes	Yes	Nano MiSeq PE70/
							MiSeq PE75
MK67	Bone	52	Yes	No	Yes	Yes	HiSeq SR100
MK68	Bone	43.8	Yes	No	No	No	NA
MK69	Bone	28.1	Yes	No	Yes	Yes	HiSeq SR100
MK70	Bone	46	Yes	No	No	No	NA
MK71	Bone	37.1	Yes	No	Yes	Yes	HiSeq SR100
MK72	Bone	30	Yes	No	Yes	Yes	MiSeq PE150/
							HiSeq SR100
MK73	Bone	49	Yes	No	Yes	Yes	HiSeq SR100
MK74	Bone	48.4	Yes	No	Yes	Yes	HiSeq SR100
MK75	Bone	44	Yes	No	Yes	Yes	HiSeq SR100
MK76	Bone	42.8	Yes	No	Yes	Yes	Nano MiSeq PE70/
							MiSeq PE75
MK77	Bone	54.1	Yes	No	Yes	Yes	MiSeq PE75
MK78	Bone	56.2	Yes	No	Yes	Yes	Nano MiSeq PE70/
							MiSeq PE75
MK79	Bone	45.8	Yes	No	No	No	NA
MK80	Bone	51.5	Yes	No	Yes	Yes	Nano MiSeq PE70/
							MiSeq PE75
MK81	Bone	55	Yes	No	Yes	Yes	Nano MiSeq PE70/
							MiSeq PE75
MK82	Bone	55	Yes	No	Yes	Yes	MiSeq PE75
MK83	Bone	49.7	Yes	No	Yes	Yes	Nano MiSeq PE70/
							MiSeq PE75
MK84	Bone	54	Yes	No	Yes	Yes	MiSeq PE75
MK85	Bone	57	Yes	No	No	No	NA
MK86	Bone	47.3	Yes	No	Yes	Yes	MiSeq PE75
MK87	Bone	50	Yes	No	No	No	NA
MK88	Bone	50.3	Yes	No	No	No	NA
MK89	Bone	56.4	Yes	No	No	No	NA
MK90	Bone	43.7	Yes	No	No	No	NA
MK91	Bone	41.1	Yes	No	Yes	Yes	Nano MiSeq PE70/
							MiSeq PE75
MK92	Bone	55.3	Yes	No	No	No	NA
MK93	Bone	51	Yes	No	No	No	NA
MK94	Bone	48.9	Yes	No	No	No	NA
MK95	Bone	41.3	Yes	No	No	No	NA
MK96	Bone	53	Yes	No	No	No	NA
MK97	Bone	53	Yes	No	No	No	NA
MK98	Bone	46.7	Yes	No	No	No	NA
MK99	Bone	48.5	Yes	No	No	No	NA
MK100	Bone	44.3	Yes	No	No	No	NA
MK101	Bone	51.8	Yes	No	No	No	NA
MK102	Bone	58	Yes	No	No	No	NA
MK103	Bone	46.4	Yes	No	Yes	Yes	MiSeq PE75
MK104	Bone	49.7	Yes	No	Yes	No	HiSeq SR100
MK105	Bone	57.1	Yes	No	No	No	NA
MK106	Bone	45	Yes	No	Yes	Yes	Nano MiSeq PE70/
							MiSeq PE75
MK107	Bone	48	Yes	No	No	No	NA
MK108	Bone	41.9	Yes	No	Yes	Yes	MiSeq PE75
MK109	Bone	42.8	Yes	No	No	No	NA
MK110	Bone	53.7	Yes	No	Yes	Yes	HiSeq SR100
MK111	Bone	55.9	Yes	No	No	No	NA
MK112	Bone	56.1	Yes	No	Yes	Yes	HiSeq SR100
MK113	Bone	49.1	Yes	No	No	No	NA
MK114	Bone	49.1	Yes	No	No	No	NA
MK115	Bone	45.7	Yes	No	Yes	Yes	HiSeq SR100
MK116	Bone	37	Yes	No	Yes	Yes	HiSeq SR100
MK117	Bone	26.7	Yes	No	No	No	NA
MK118	Bone	57.5	Yes	No	Yes	Yes	HiSeq SR100
MK119	Bone	37.1	Yes	No	No	No	NA
MK120	Bone	33	Yes	No	Yes	Yes	NA
MK121	Bone	16.9	Yes	No	Yes	Yes	HiSeq SR100
MK122	Bone	21.1	Yes	No	Yes	Yes	Nano MiSeq PE70/
							MiSeq PE75
MK123	Bone	18.8	Yes	No	Yes	Yes	Nano MiSeq PE70/
							MiSeq PE75
MK124	Bone	31.2	Yes	No	No	No	NA
MK125	Bone	45.3	Yes	No	Yes	Yes	Nano MiSeq PE70/
							MiSeq PE75
MK126	Bone	53.1	Yes	No	No	No	NA
MK127	Bone	51.1	Yes	No	No	No	NA
MK128	Bone	52.4	Yes	No	Yes	Yes	MiSeq PE75
MK129	Bone	51.6	Yes	No	No	No	NA
MK130	Bone	48.7	Yes	No	Yes	Yes	MiSeq PE75
MK131*	Oesophagus tissue	-	Yes	No	Yes	Yes	Nano MiSeq PE70/
							MiSeq PE75
MK132*	Oesophagus tissue	-	Yes	No	Yes	Yes	Nano MiSeq PE70/
							MiSeq PE75
MK133*	Body tissue	-	Yes	No	Yes	Yes	Nano MiSeq PE70/
							MiSeq PE75
MK134*	Toepad tissue	-	Yes	No	Yes	Yes	Nano MiSeq PE70/
							MiSeq PE75
MK135*	Toepad tissue	-	Yes	No	Yes	Yes	Nano MiSeq PE70/
							MiSeq PE75
MK136*	Feather	-	Yes	No	Yes	Yes	Nano MiSeq PE70/
							MiSeq PE75
MK137	Feather	-	Yes	No	Yes	Yes	Nano MiSeq PE70/
							MiSeq PE75
MK138*	Toepad tissue	-	Yes	No	Yes	No	HiSeq SR80
LastGA2_Heart*	Heart tissue	-	Yes	Yes	No	Yes	HiSeq Various

## Sheet: Supplementary File 1c
						Results when mapped to GA_mtgenome_OSLO_KU158188
Lab ID	Library type SE, PE, or * (for both)	Total number of SE reads	Total number of pairs	Total number of retained reads	Average number of NTs in retained reads	Total number of hits	Total number of hits vs. total number of reads retained	Fraction of hits that were PCR duplicates	Total number of hits (excluding any PCR duplicates)	Total number of unique hits vs. total number of reads retained	Estimated coverage from unique hits	Average number of aligned bases per unique hit
						(prior to PCR duplicate filtering)
MK10	PE		1145987	1168457	58.67	938703	0.80337	0.99456	5102	0.00437	17.602	57.91
MK13	PE		576586	595791	55.8	162526	0.27279	0.99386	998	0.00168	3.322	55.88
MK15	PE		467164	474690	52.41	273647	0.57648	0.98952	2867	0.00604	9.5	55.62
MK21	PE		1078089	1134756	50.18	57860	0.05099	0.91772	4761	0.0042	15.252	53.77
MK25	*	8454960	1645926	6009299	50.77	748444	0.12455	0.99249	5620	0.00094	15.342	45.82
MK26	SE	7005801		5199184	40.37	455	9e-05	0.11429	403	8e-05	1.406	58.54
MK28	*	15372548	6342089	19468085	51.99	310788	0.01596	0.90133	30664	0.00158	122.777	67.2
MK29	SE	10022700		7991112	42.03	642	8e-05	0.28505	459	6e-05	1.6	58.52
MK30	PE		808415	846355	54.48	1749	0.00207	0.33047	1171	0.00138	3.58	51.31
MK31	PE		158063	155088	47.84	197	0.00127	0.41624	115	0.00074	0.367	53.6
MK34	PE		426833	431557	54.16	16851	0.03905	0.98505	252	0.00058	0.863	57.48
MK37	SE	1181690		971375	42.59	1788	0.00184	0.94855	92	9e-05	0.279	50.87
MK38	SE	14789745		12607841	51.9	40653	0.00322	0.96298	1505	0.00012	6.388	71.24
MK40	*	3692259	1873507	4624647	51.24	101361	0.02192	0.91065	9057	0.00196	25.742	47.7
MK42	PE		628699	654160	57.3	33395	0.05105	0.9838	541	0.00083	2.074	64.33
MK44	PE		619588	649236	59.47	2943	0.00453	0.89976	295	0.00045	1.048	59.64
MK45	SE	9160386		7557907	46.05	106	1e-05	0.48113	55	1e-05	0.181	55.15
MK46	*	6697251	3601212	9292709	49.71	44531	0.00479	0.68923	13839	0.00149	43.774	53.09
MK47	SE	2309668		2210675	44.04	43726	0.01978	0.81414	8127	0.00368	23.401	48.33
MK48	*	5378635	2392050	6119108	43.55	575343	0.09402	0.79342	118854	0.01942	369.559	52.19
MK49	*	607157	1328601	1938752	52.93	1149304	0.59281	0.97466	29129	0.01502	95.219	54.86
MK50	*	1007261	492096	1502692	59.38	848108	0.56439	0.96013	33818	0.0225	175.194	86.95
MK51	SE	6442312		5225053	40.38	52353	0.01002	0.63908	18895	0.00362	64.831	57.59
MK53	SE	954018		595157	37.64	1893	0.00318	0.88378	220	0.00037	0.675	51.5
MK54	PE		759852	891455	58.89	29590	0.03319	0.99649	104	0.00012	0.345	55.69
MK55	*	1351278	1779892	1360629	85.82	4215	0.0031	0.93286	283	0.00021	0.727	43.1
MK57	PE		616943	576859	47.59	106	0.00018	0.00943	105	0.00018	0.311	49.68
MK58	SE	9838472		7430415	42.14	2483	0.00033	0.53	1167	0.00016	4.03	57.96
MK60	PE		208549	194105	50.2	2415	0.01244	0.91718	200	0.00103	0.569	47.75
MK62	PE		111336	109888	53.19	25744	0.23427	0.99674	84	0.00076	0.243	48.48
MK63	PE		726857	700891	53.27	3181	0.00454	0.93052	221	0.00032	0.666	50.55
MK64	SE	6458031		4838037	41.01	1563	0.00032	0.38196	966	0.0002	3.084	53.59
MK65	PE		873614	919981	60.35	3065	0.00333	0.88907	340	0.00037	1.107	54.64
MK66	PE		309023	311687	51.69	8022	0.02574	0.94702	425	0.00136	1.159	45.78
MK67	SE	7260998		5226387	47.65	5020	0.00096	0.96733	164	3e-05	0.547	56.01
MK69	SE	3421051		2662747	46.87	1114	0.00042	0.95332	52	2e-05	0.176	56.81
MK71	SE	17614027		11738258	45.26	96099	0.00819	0.99487	493	4e-05	1.647	56.08
MK72	*	1900651	2033404	3134784	54.82	151240	0.04825	0.69118	46706	0.0149	147.925	53.16
MK73	SE	32330272		23293864	42.47	2450232	0.10519	0.98965	25359	0.00109	89.017	58.92
MK74	SE	6063592		4831238	40.63	22587	0.00468	0.86399	3072	0.00064	9.761	53.33
MK75	SE	4307305		3267171	39.57	43950	0.01345	0.94146	2573	0.00079	7.655	49.93
MK76	PE		384370	357506	47.25	23902	0.06686	0.84905	3608	0.01009	11.178	52
MK77	PE		1369136	1369627	57.12	125097	0.09134	0.99615	482	0.00035	1.593	55.48
MK78	PE		153456	144577	47.81	49095	0.33958	0.93955	2968	0.02053	8.707	49.24
MK80	PE		191309	188180	48.62	18736	0.09956	0.99408	111	0.00059	0.352	53.15
MK81	PE		524993	516514	59.09	2812	0.00544	0.81508	520	0.00101	1.697	54.76
MK82	PE		4538224	4471446	52.69	263178	0.05886	0.99237	2007	0.00045	6.772	56.63
MK83	PE		489039	502957	65.68	21346	0.04244	0.88251	2508	0.00499	8.54	57.15
MK84	PE		2756073	2795101	57.39	965141	0.3453	0.98962	10016	0.00358	33.601	56.31
MK86	PE		3925441	3935947	57.08	1201748	0.30533	0.99741	3109	0.00079	10.087	54.45
MK91	PE		178038	174894	51.74	90017	0.51469	0.955	4051	0.02316	13.018	53.94
MK103	PE		599411	603360	52.67	9470	0.0157	0.40528	5632	0.00933	18.388	54.8
MK104	SE	9017013		8115882	51.6	2784572	0.3431	0.98867	31544	0.00389	146.081	77.73
MK106	PE		468952	472856	55.41	323508	0.68416	0.97194	9078	0.0192	30.35	56.11
MK108	PE		869643	876993	53.81	485179	0.55323	0.91049	43426	0.04952	136.617	52.8
MK110	SE	12818613		11671609	54.38	7157685	0.61326	0.99686	22452	0.00192	84.489	63.16
MK112	SE	5433398		3444422	42.94	2322	0.00067	0.51852	1118	0.00032	3.434	51.55
MK115	SE	5313081		4491377	44.22	108963	0.02426	0.79649	22175	0.00494	90.606	68.58
MK116	SE	6572626		5226835	39.7	369429	0.07068	0.91817	30232	0.00578	122.122	67.8
MK118	SE	5822506		3588232	40.84	83	2e-05	0.43373	47	1e-05	0.142	50.6
MK121	SE	8655497		7383179	48.15	298656	0.04045	0.95245	14201	0.00192	51.475	60.84
MK122	PE		502683	497894	49.6	343386	0.68968	0.96493	12042	0.02419	33.992	47.38
MK123	PE		624973	660170	58.19	1217	0.00184	0.85456	177	0.00027	0.599	56.81
MK125	PE		523729	532859	53.79	94063	0.17653	0.97315	2526	0.00474	8.219	54.61
MK128	PE		610041	594553	46.92	34	6e-05	0.02941	33	6e-05	0.118	59.97
MK130	PE		320431	305710	45.97	5483	0.01794	0.21029	4330	0.01416	12.517	48.52
MK131	PE		300754	277897	42.24	44118	0.15876	0.31327	30297	0.10902	74.396	41.21
MK132	PE		550631	555358	52.91	257053	0.46286	0.9908	2365	0.00426	6.222	44.15
MK133	PE		429392	434144	47.07	398068	0.9169	0.97802	8750	0.02015	23.041	44.2
MK134	PE		343766	333106	54.24	147070	0.44151	0.41303	86326	0.25915	288.624	56.12
MK135	PE		579992	581760	54.73	96607	0.16606	0.71257	27768	0.04773	88.901	53.73
MK136	PE		563635	554179	53.79	29361	0.05298	0.16893	24401	0.04403	67.829	46.66
MK137	PE		193090	220496	59.91	3757	0.01704	0.9819	68	0.00031	0.224	55.28
MK138	SE	10796460		9368986	46.6	113937	0.01216	0.97543	2799	0.0003	9.756	58.5
LastGA2_Heart	SE	957970612		951654295	55.64	294476	0.00031	0.58609	121886	0.00013	430.094	59.22

## Sheet: Supplementary File 1d
Lab ID	GenBank accession number
MK10	MF776845
MK15	MF776853
MK21	MF776854
MK25	MF776855
MK28	MF776856
MK38	MF776857
MK40	MF776858
MK46	MF776859
MK47	MF776860
MK48	MF776861
MK49	MF776862
MK50	MF776863
MK51	MF776864
MK72	MF776865
MK73	MF776866
MK74	MF776867
MK75	MF776868
MK76	MF776869
MK78	MF776870
MK82	MF776871
MK83	MF776872
MK84	MF776873
MK86	MF776874
MK91	MF776875
MK103	MF776841
MK104	MF776842
MK106	MF776843
MK108	MF776844
MK110	MF776846
MK115	MF776847
MK116	MF776848
MK121	MF776849
MK122	MF776850
MK125	MF776851
MK130	MF776852
MK133	MF188884
MK134	MF188885
MK135	MF188886
MK136	MF188887
MK138	MF188888
LASTGA2_Heart	MF188889

## Sheet: Supplementary File 1e
Sample ID	Median Age if known	TempNet Category
		kya=thousand years ago
MK10	2850	1–12 kya
MK15	1400	1–12 kya
MK21	4000	1–12 kya
MK25	4000	1–12 kya
MK28	2000	1–12 kya
MK38	13250	>12 kya
MK40	13950	>12 kya
MK46	Unknown but unlikely to be over 1000 years old	250–500
MK47	Unknown but unlikely to be over 1000 years old	250–500
MK48	Unknown but unlikely to be over 5000	1–12 kya
MK49	Unknown but unlikely to be over 5000	1–12 kya
MK50	202	<250
MK51	196	<250
MK72	1800	1–12 kya
MK73	1800	1–12 kya
MK74	Unknown but unlikely to be over 1000 years old	250–500
MK75	Unknown but unlikely to be over 1000 years old	250–500
MK76	Unknown but unlikely to be over 1000 years old	250–500
MK78	Unknown but unlikely to be over 1000 years old	250–500
MK82	Unknown but unlikely to be over 1000 years old	250–500
MK83	Unknown but unlikely to be over 1000 years old	250–500
MK84	Unknown but unlikely to be over 1000 years old	250–500
MK86	Unknown but unlikely to be over 1000 years old	250–500
MK91	Unknown but unlikely to be over 1000 years old	250–500
MK103	Unknown but unlikely to be over 1000 years old	250–500
MK104	5000	1–12 kya
MK106	5000	1–12 kya
MK108	4250	1–12 kya
MK110	4250	1–12 kya
MK115	3350	1–12 kya
MK116	4950	1–12 kya
MK121	4350	1–12 kya
MK122	2250	1–12 kya
MK125	Unknown but unlikely to be over 1000 years old	250–500
MK130	Unknown but unlikely to be over 1000 years old	250–500
MK133	200	<250
MK134	200	<250
MK135	173	<250
MK136	200	<250
MK138	200	<250
LastGA2_Heart	173	<250
