# Supplementary material for: Demographic reconstruction from ancient DNA supports rapid extinction of the great auk
Source: eLife. 2019 Nov 26;8:e47509. doi: 10.7554/eLife.47509 (PMC6879203; doi:10.7554/eLife.47509)
Supplement: Supplementary file 2. — Supplementary file 2a Settings used in Population Viability Analysis. Details of the settings used for Population Viability Analysis performed in Vortex 10.2.8.0. Information displayed corresponds to the various setting sections in the software and the variables that were changed. Further details on justification for these settings can be found in Appendix 8. Supplementary file 2b Details of mortality rates used in Population Viability Analysis. Details of the mortality rate settings used in Population Viability Analysis performed in Vortex 10.2.8.0, showing formula information for including density-dependent change and additional justification. Supplementary file 2c Harvest rate calculations. Example of how harvest rates of birds and eggs were calculated for the Population Viability Analysis. [file elife-47509-supp2.xlsx]

## Sheet: Supplementary File 2a
Vortex settings	Conservative settings	Realistic settings	Notes
Scenario settings
Number of iterations	100	100
Number of years (timesteps)	350	350
Duration of each year in days	365	365
Run as population-based model	Yes	Yes
Extinction definition	Tested both	One sex remaining	If defined by Total N, critical size defined as 50 and 500
Number of populations	1	1
Species Description
Inbreeding depression	No	No
EV correlation between reproduction and survival	0.5	0.5
State Variables	None	None
Population State Variables	Label: psvar1	Label: psvar1	Initialisation function: =N/K. Transition function: =N/K. Default Values for Variables in Functions: Both N and K = initial population size
Reproductive System	Monogamous	Monogamous
Age of first offspring females	4	5	Estimated breeding age 4-7
Age of first offspring males	4	5
Max lifespan	25	22	Estimated long lived 20-25
Max number of broods per year	1	1	Did not relay second egg if first lost
Max number of progenies per brood	1	1	Only one brood patch, individuals observed with one egg/chick
Sex ratio at birth	0.5	0.5	No reason to believe otherwise
Maximum age of female reproduction	25	20	Assume breed till death, but very old individuals may have reduced reproductive success
Maximum age of male reproduction	25	20
Make offspring depend on their dam	No	No	Would only be dependent for a few weeks.
Reproductive Rates
% adult females breeding	1	0.9	At least several alcid species breed annually once they have reached sexual maturity
SD in % breeding due to EV (environmental variables)	0	10
Distribution of broods per year
0 Broods	0	0
1 Broods	100	100
Specify the distribution of number of offspring per female per brood
Specify exact distribution	1 offspring. 100	1 offspring. 100
Mortality Rates	See Table S10	See Table S10
Catastrophe	0
Mate monopolisation
% males in breeding pool	100
Initial population size	2,000,000 or 6,000,000	2000000
Use stable age distribution
Carrying capacity	Same as population size	Same as population size
SD	0	0
Harvest	Varied	40000	See Table S11 for example
Supplementation	No	No
Genetics	No	No

## Sheet: Supplementary File 2b
Mortality rates	No density dependent change	Including density dependent change	Realistic settings	Including density dependent change (realistic settings)	Notes
		(conservative settings)
Mortality of females as %
0 to 1	9	(0.5+(0.5*ps1))*9	30	(0.5+(0.5*ps1))*30	Conservatively based on Japanese murrelet and ancient murrelet survival rates with 91% hatching success and 90% 0-1 year survival
SD	1	(0.5+(0.5*ps1))*1	10	(0.5+(0.5*ps1))*10
1 to 2	13	(0.5+(0.5*ps1))*13	25	(0.5+(0.5*ps1))*25
SD	1	(0.5+(0.5*ps1))*1	5	(0.5+(0.5*ps1))*5
2 to 3	13	(0.5+(0.5*ps1))*13	25	(0.5+(0.5*ps1))*25
SD	1	(0.5+(0.5*ps1))*1	5	(0.5+(0.5*ps1))*5
3 to 4	13	(0.5+(0.5*ps1))*13	25	(0.5+(0.5*ps1))*25
SD	1	(0.5+(0.5*ps1))*1	5	(0.5+(0.5*ps1))*5	Fledgling success 66% crested auklet (year 1-year 4)
4 to 5	7	(0.5+(0.5*ps1))*7	25	(0.5+(0.5*ps1))*25	Razorbill 93% survival rate
SD	1	(0.5+(0.5*ps1))*1	5	(0.5+(0.5*ps1))*5
After 5	7	(0.5+(0.5*ps1))*7	7	(0.5+(0.5*ps1))*7
SD	1	(0.5+(0.5*ps1))*1	2	(0.5+(0.5*ps1))*2
Mortality of males as %
0 to 1	9	(0.5+(0.5*ps1))*9	30	(0.5+(0.5*ps1))*30
SD	1	(0.5+(0.5*ps1))*1	10	(0.5+(0.5*ps1))*10
1 to 2	13	(0.5+(0.5*ps1))*13	25	(0.5+(0.5*ps1))*25
SD	1	(0.5+(0.5*ps1))*1	5	(0.5+(0.5*ps1))*5
2 to 3	13	(0.5+(0.5*ps1))*13	25	(0.5+(0.5*ps1))*25
SD	1	(0.5+(0.5*ps1))*1	5	(0.5+(0.5*ps1))*5
3 to 4	13	(0.5+(0.5*ps1))*13	25	(0.5+(0.5*ps1))*25
SD	1	(0.5+(0.5*ps1))*1	5	(0.5+(0.5*ps1))*5
4 to 5	7	(0.5+(0.5*ps1))*7	25	(0.5+(0.5*ps1))*25
SD	1	(0.5+(0.5*ps1))*1	5	(0.5+(0.5*ps1))*5
After 5	7	(0.5+(0.5*ps1))*7	7	(0.5+(0.5*ps1))*7
SD	1	(0.5+(0.5*ps1))*1	2	(0.5+(0.5*ps1))*2

## Sheet: Supplementary File 2c
Example of harvest rate calculations for population size 6 million
Birds
10% of population harvested	600000
75% of hunted individuals were 4 years and older (mature)	450000
Number of mature birds of one sex hunted	225000
Remaining 25% hunted birds were either 1-2, 2-3 or 3-4 years of age	150000
Number of remaining birds of one sex hunted	75000
Number of remaining birds of one sex hunted per year (for age class 1-2, 2-3, and 3-4)	25000
Eggs
Number of mature individuals (4 years and older)	3082594	Estimated from initial population size dependent on age of maturity and fixed natural mortality rates
Number of eggs at 100% breeding	1541297
5% of number of eggs	77065
Harvested number of eggs per sex (for simulations, this includes all birds 0-1 years of age)	38532
Example of harvest rate settings used with the above settings
Female	Age group
	0-1	38532
	2019-02-01	25000
	2019-03-02	25000
	2019-04-03	25000
	4 an older	225000
Male	Age group
	0-1	38532
	2019-02-01	25000
	2019-03-02	25000
	2019-04-03	25000
	4 an older	225000
